# Supplementary material
Source: PubMed Central journal article supplement (PMC10359192)
Supplement: NIHMS1836086-supplement-sup.pdf [file NIHMS1836086-supplement-sup.pdf]

| Author Name             | ORCID (optional)                                                     | (Yes/No) | Company 1           | Company 1            | Company 2         | Company 2        |
|-------------------------|----------------------------------------------------------------------|----------|---------------------|----------------------|-------------------|------------------|
| Jolie L. Chang          | <a href="https://orcid.org/0002-0778-1044">0002-0778-1044</a>        | No       |                     |                      |                   |                  |
| Andrew N. Goldberg      | <a href="https://orcid.org/0002-0301-2926">0002-0301-2926</a>        | Yes      | Siesta Medical Inc. | Minor stockholder    | Nipro Corporation | Consultant       |
| Jeremiah A. Alt         | <a href="https://orcid.org/0003-0560-5028">0003-0560-5028</a>        | Yes      | Medtronic           | Consultant           | OptiNose          | Consultant       |
| Mohammed Alzoubaidi     | <a href="https://orcid.org/0002-3938-6671">0002-3938-6671</a>        | No       |                     |                      |                   |                  |
| Liza Ashbrook           | <a href="https://orcid.org/0003-2437-8203">0003-2437-8203</a>        | Yes      | Neurocrine          | Research funding     | Novartis          | Research funding |
| Dennis Auckley          | <a href="https://orcid.org/0000-0000-0000">https://orcid.org/000</a> | Yes      | ABIM                | Approval Committee   | UptoDate          | writer           |
| Indu Ayappa             | 9467                                                                 | Yes      | Care (FPH)          | Royalties on patents |                   |                  |
| Hira Bakhtiar           |                                                                      | No       |                     |                      |                   |                  |
| Jose E. Barrera         |                                                                      | No       |                     |                      |                   |                  |
| Bethany L. Bartley      | <a href="https://orcid.org/0002-9043-6697">0002-9043-6697</a>        | No       |                     |                      |                   |                  |
| Martha E. Billings      |                                                                      |          |                     |                      |                   |                  |
| Maurits S. Boon         |                                                                      | Yes      | Inspire medical     | support              | Nyxoah Medical    | research support |
| Pien Bosschieter        |                                                                      |          |                     |                      |                   |                  |
| Itzhak Braverman        | <a href="https://orcid.org/0002-1866-94888">0002-1866-94888</a>      | Yes      | Faception           |                      |                   |                  |
| Kara Brodie             |                                                                      | No       |                     |                      |                   |                  |
| Cristina Cabrera-Muffly | <a href="https://orcid.org/0001-7697-8871">0001-7697-8871</a>        | No       |                     |                      |                   |                  |
| Ray Caesar              |                                                                      |          |                     |                      |                   |                  |
| Michel B. Cahali        | <a href="https://orcid.org/0002-5704-160X">0002-5704-160X</a>        | Yes      | Biologix            | Investor             |                   |                  |
| Yi Cai                  | <a href="https://orcid.org/0002-0853-2779">0002-0853-2779</a>        | No       |                     |                      |                   |                  |
| Michelle Cao            |                                                                      | No       |                     |                      |                   |                  |
| Robson Capasso          |                                                                      | Yes      | Invicta Medical     | Advisor              | Bryte, LLC        | Advisor          |
| Sean M. Caples          |                                                                      | No       |                     |                      |                   |                  |
| Lana M. Chahine         |                                                                      | No       |                     |                      |                   |                  |
| Corissa P. Chang        |                                                                      | No       |                     |                      |                   |                  |
| Katherine W. Chang      |                                                                      | No       |                     |                      |                   |                  |
| Nilika Chaudhary        |                                                                      | No       |                     |                      |                   |                  |
| Crystal S.J. Cheong     | <a href="https://orcid.org/0002-7238-327X">0002-7238-327X</a>        | No       |                     |                      |                   |                  |
| Susmita Chowdhuri       | 1169                                                                 | No       |                     |                      |                   |                  |
| Peter A. Cistulli       | 4924                                                                 | Yes      | ResMed              | funded by ResMed;    | SomnoMed          | Consultant, MAB  |
| David Claman            |                                                                      | no       |                     |                      |                   |                  |

| Company 3 |                     | Company 4 |                     | Company 5 |            | Company 6 |  |
|-----------|---------------------|-----------|---------------------|-----------|------------|-----------|--|
| ne        | Consultant          | GlycoMira | Stock options       |           |            |           |  |
|           |                     |           |                     |           |            |           |  |
| Itamar    | Educational funding | Jazz      | Educational funding |           |            |           |  |
|           |                     |           |                     |           |            |           |  |
| CryOSA    | Consultant          |           |                     |           |            |           |  |
|           |                     |           |                     |           |            |           |  |
| Medical   | MAB                 | Bayer     | Consultant          | Medical   | Consultant |           |  |
|           |                     |           |                     |           |            |           |  |





|                        |                                                               |     |                         |                        |             |                  |
|------------------------|---------------------------------------------------------------|-----|-------------------------|------------------------|-------------|------------------|
| Jacob Collen           |                                                               | no  |                         |                        |             |                  |
| Kevin C. Coughlin      |                                                               | No  |                         |                        |             |                  |
| Jennifer Creamer       | <a href="https://orcid.org/000">https://orcid.org/000</a>     | no  |                         |                        |             |                  |
| Eric M. Davis          |                                                               | no  |                         |                        |             |                  |
| Kara L. Dupuy-McCauley | <a href="https://orcid.org/0003-1874-7818">0003-1874-7818</a> | Yes | Respicardia             | Consultant             |             |                  |
| Megan L. Durr          |                                                               | No  |                         |                        |             |                  |
| Mohan Dutt             |                                                               |     |                         |                        |             |                  |
| Mazen El Ali           |                                                               |     |                         |                        |             |                  |
| Nabil M. Elkassabany   | <a href="https://orcid.org/0003-3503-4828">0003-3503-4828</a> | Yes | Regional Anesthesia and | directors              |             |                  |
| Lawrence J. Epstein    |                                                               | Yes | Sleep Medicine          | Consultant             | Health      | Consultant       |
| Justin A. Fiala        | 0000-0001-5196-70                                             | Yes | Sleep Medicine          | recipient              |             |                  |
| Neil Freedman          |                                                               | No  |                         |                        |             |                  |
| Kirat Gill             |                                                               | No  |                         |                        |             |                  |
| M. Boyd Gillespie      |                                                               | Yes | Nyxoah                  | Investigator           | Medtronic   | Consultant       |
| Lea Golisch            |                                                               | No  |                         |                        |             |                  |
| Nalaka Gooneratne      |                                                               |     |                         |                        |             |                  |
| Daniel J. Gottlieb     | 8751                                                          | No  | Technologies            | Advisory Board         |             |                  |
| Katherine K. Green     |                                                               | Yes | Inspire Medical         | (Adhere)               |             |                  |
| Arushi Gulati          | <a href="https://orcid.org/0002-8060-2954">0002-8060-2954</a> | No  |                         |                        |             |                  |
| Indira Gurubhagavatula |                                                               |     |                         |                        |             |                  |
| Nathan Hayward         |                                                               |     |                         |                        |             |                  |
| Paul T. Hoff           |                                                               | Yes | Cryosa                  | Safety officer         |             |                  |
| Oliver M.G. Hoffmann   |                                                               | No  |                         |                        |             |                  |
| Steven J. Holfinger    | 9504                                                          | No  |                         |                        |             |                  |
| Jennifer Hsia          |                                                               |     |                         |                        |             |                  |
| Colin Huntley          | 3630                                                          | Yes | Inspire Medical         | Research Support       | Nyxoah      | Research Support |
| Kevin C. Huoh          |                                                               | Yes | Smith Nephew            | Educational consultant |             |                  |
| Phillip Huyett         | 3266                                                          | Yes | Insire Medical Systems  | Research support       | Nyxoah, Inc | Research Support |
| Sanjana Inala          | <a href="https://orcid.org/0002-9733-516X">0002-9733-516X</a> | No  |                         |                        |             |                  |
| Stacey L. Ishman       | <a href="https://orcid.org/0003-0997-9692">0003-0997-9692</a> | yes | Inspire Medical         | Recipient              |             |                  |
| Tarun K. Jella         |                                                               |     |                         |                        |             |                  |









|                         |                                                                                         |                    |                         |                           |                    |                       |
|-------------------------|-----------------------------------------------------------------------------------------|--------------------|-------------------------|---------------------------|--------------------|-----------------------|
| Aesha M. Jobanputra     | <a href="tel:0002-8293-5971">0002-8293-5971</a>                                         | No                 |                         |                           |                    |                       |
| Andrew P. Johnson       |                                                                                         | No                 |                         |                           |                    |                       |
| Mithri R. Junna         |                                                                                         | No                 |                         |                           |                    |                       |
| Jenna T. Kado           | <a href="https://orcid.org/0000-0002-0000-0002">.org/0000-0002</a>                      | No                 |                         |                           |                    |                       |
| Thomas M. Kaffenberger  |                                                                                         |                    |                         |                           |                    |                       |
| Vishesh K. Kapur        |                                                                                         | No                 | AASM (disclosure)       | time of this publication, |                    |                       |
| Eric J. Kezirian        | 4521                                                                                    | Yes                | Inspire Medical Systems | Research Funding          | CryOSA             | Member                |
| Meena Khan              |                                                                                         | no                 |                         |                           |                    |                       |
| Douglas B. Kirsch       | 8174                                                                                    | Yes                | Apnimed                 | Board Member              | SleepImage         | Scientific Advisory B |
| Alan Kominsky           |                                                                                         |                    |                         |                           |                    |                       |
| Meir Kryger             |                                                                                         |                    |                         |                           |                    |                       |
| Andrew D. Krystal       |                                                                                         | Yes (see column P) |                         |                           |                    |                       |
| Clete A. Kushida        | 3752                                                                                    | Yes                | Cerebra Therapeutics    | Board Member              | Vivos Therapeutics | Board Member          |
| Thomas J. Kuzniar       |                                                                                         | No                 |                         |                           |                    |                       |
| Derek J. Lam            | <a href="tel:0002-8979-3478">0002-8979-3478</a>                                         | No                 |                         |                           |                    |                       |
| Christopher J. Lettieri | 0000-0001-7950-29                                                                       | yes                | Idorsia                 | Paid employee             |                    |                       |
| Diane C. Lim            |                                                                                         | Yes                | Apnimed                 | Board Member              |                    |                       |
| Hsin-Ching Lin          | <a href="tel:0000-0002-8822-0619">0000-0002-8822-0619</a>                               | Yes                | Sunnyvale, CA.          | Research Grants           |                    |                       |
| Stanley Y.C. Liu        |                                                                                         |                    |                         |                           |                    |                       |
| Stuart G. MacKay        |                                                                                         | Yes                | Nyxoah                  | Consultant                | CNXII              | Consultant            |
| Ulysses J. Magalang     | <a href="tel:0002-5052-2494">0002-5052-2494</a>                                         | Yes                | Philips                 | Research Grant            | Nyxoah             | Research Grant        |
| Atul Malhotra           | <a href="http://orcid.org/0000-0001-9148-0000">http://orcid.org/0000-0001-9148-0000</a> | yes                | Livanova                | consultant                | Eli Lilly          | consultant            |
| Meghna P. Mansukhani    | 5640                                                                                    | Yes                | NIH                     | Research Grant            |                    |                       |
| Joachim T. Maurer       | <a href="tel:0000-0003-2308-7041">0000-0003-2308-7041</a>                               | Yes                | Livanova Medical        | Honoraria for lectures    | Inspire Medical    | invited lectures      |
| Anna M. May             | <a href="mailto:Anna.May@0000-0002-0180-0000">.May (0000-0002-0180-0000)</a>            | Yes                | LiveNove, Inc           | DSMB honoraria            |                    |                       |
| Ron B. Mitchell         | <a href="https://orcid.org/my-orcid">https://orcid.org/my-orcid</a>                     | No                 |                         |                           |                    |                       |
| Babak Mokhlesi          |                                                                                         |                    |                         |                           |                    |                       |
| Anna E. Mullins         | 6977                                                                                    | No                 |                         |                           |                    |                       |
| Eman Nada               | 9108                                                                                    | No                 |                         |                           |                    |                       |
| Sreelatha Naik          | 3435                                                                                    | No                 |                         |                           |                    |                       |
| Brandon Nokes           |                                                                                         | No                 |                         |                           |                    |                       |







|                         |                                |     |                 |                           |                              |                     |
|-------------------------|--------------------------------|-----|-----------------|---------------------------|------------------------------|---------------------|
| Michael D. Olson        |                                | No  |                 |                           |                              |                     |
| Allan I. Pack           | 0000-0002-2879-048             | No  |                 |                           |                              |                     |
| Edward B. Pang          |                                | No  |                 |                           |                              |                     |
| Kenny P. Pang           |                                | No  |                 |                           |                              |                     |
| Susheel P. Patil        |                                |     |                 |                           |                              |                     |
| Jay F. Piccirillo       |                                |     |                 |                           |                              |                     |
| Grace W. Pien           | 1612                           | No  | (disclosure)    | time of this publication, | <a href="#">(disclosure)</a> | royalties           |
| Amanda J. Piper         | 6172                           | yes | ResMed          | presentations             | Philips                      | presentations       |
| Andrea Plawecki         |                                |     |                 |                           |                              |                     |
| Mark Quigg              |                                | Yes | Natus           | Consulting                | Therapeutics                 | DSMB                |
| Madeline J.L. Ravesloot | 5811                           | No  |                 |                           |                              |                     |
| Susan Redline           | 1610                           | Yes | Apnimed Inc     | Board                     | Eli Lilly                    | Consuted in 2021    |
| Brian W. Rotenberg      | 3142                           |     | Stryker Canada  | Consultant                |                              |                     |
| Armand Ryden            |                                |     |                 |                           |                              |                     |
| Kathleen F. Sarmiento   | 9808                           | No  |                 |                           |                              |                     |
| Firas Sbeih             |                                | No  |                 |                           |                              |                     |
| Amy E. Schell           |                                | Yes | XII Medical     | Advisory                  | Inspire Medical              | support             |
| Christopher N. Schmickl | 9980                           | Yes | Verily          | supported by the          | Verily                       | Consultant          |
| Helena M. Schotland     |                                |     |                 |                           |                              |                     |
| Richard J. Schwab       |                                |     |                 |                           |                              |                     |
| Jiyeon Seo              |                                |     |                 |                           |                              |                     |
| Neomi Shah              |                                | Yes | Respicardia     | Consultant                | Bresotec                     | Member              |
| Anita Valanju Shelgikar | <a href="#">000-0002-3629-</a> | Yes | Sleep Medicine  | time of this publication, |                              |                     |
| Isaac Shochat           | <a href="#">0003-0153-8956</a> | No  |                 |                           |                              |                     |
| Ryan J. Soose           | 1505                           | Yes | Inspire Medical | Support, Consultant /     | Cryosa Inc                   | Scientific Advisory |
| Toby O. Steele          | <a href="#">0003-4664-6774</a> | No  |                 |                           |                              |                     |
| Erika M. Stephens       | <a href="#">0002-1272-9208</a> | No  |                 |                           |                              |                     |
| Carl Stepnowsky         |                                |     |                 |                           |                              |                     |
| Kingman P. Strohl       | 000-001-7740-9013              | yes | Sommetrics LLC  | Study                     | Up-to-Date                   | Chapter author      |
| Kate Sutherland         |                                |     |                 |                           |                              |                     |
| Maria V. Suurna         | 0902                           | yes | Inspire Medical | Advisory Board            | Medtronic                    | Board               |

|              |                     |                    |            |  |  |
|--------------|---------------------|--------------------|------------|--|--|
|              |                     |                    |            |  |  |
|              |                     |                    |            |  |  |
|              |                     |                    |            |  |  |
|              |                     |                    |            |  |  |
|              |                     |                    |            |  |  |
|              |                     |                    |            |  |  |
|              |                     |                    |            |  |  |
|              |                     |                    |            |  |  |
| BioSerenity  | COnsulting          |                    |            |  |  |
| Jazz Pharam  | Consulted           |                    |            |  |  |
|              |                     |                    |            |  |  |
|              |                     |                    |            |  |  |
| Resmed       | donation to UCSD    |                    |            |  |  |
|              |                     |                    |            |  |  |
| Itamar       | (completed)         |                    |            |  |  |
|              |                     |                    |            |  |  |
| XII Medical  | Scientific Advisory |                    |            |  |  |
|              |                     |                    |            |  |  |
| Merck Manual | Professional and    |                    |            |  |  |
|              |                     |                    |            |  |  |
| Nyxoah       | Consultant          | Deerfield Catalyst | Consultant |  |  |
